# Supplementary material for: Characterization of Genes for Beef Marbling Based on Applying Gene Coexpression Network
Source: Hindawi journal article supplement (doi:10.1155/2014/708562), 2014-01-01
Supplement: f1 [file 708562.f1.zip]

(A)

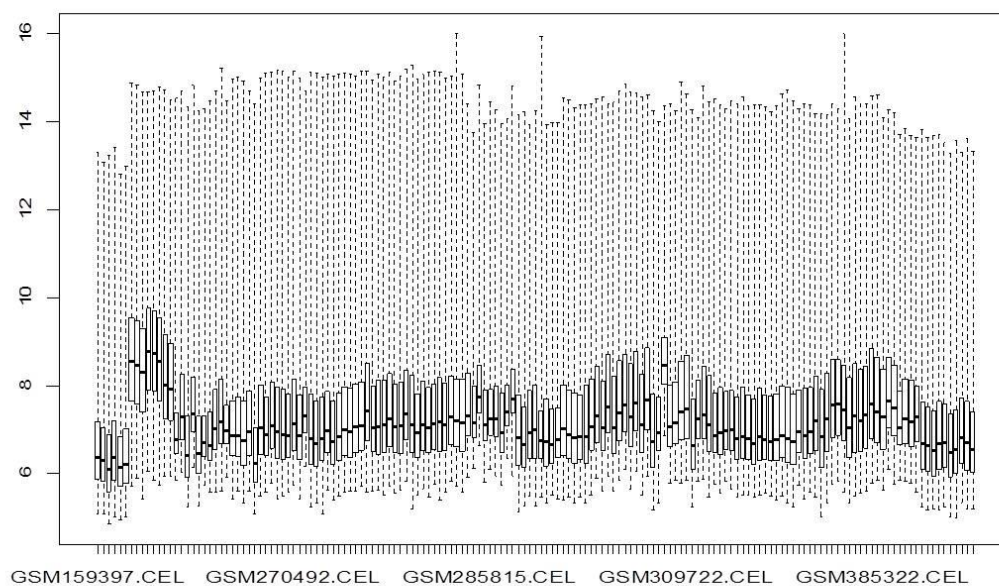

(B)

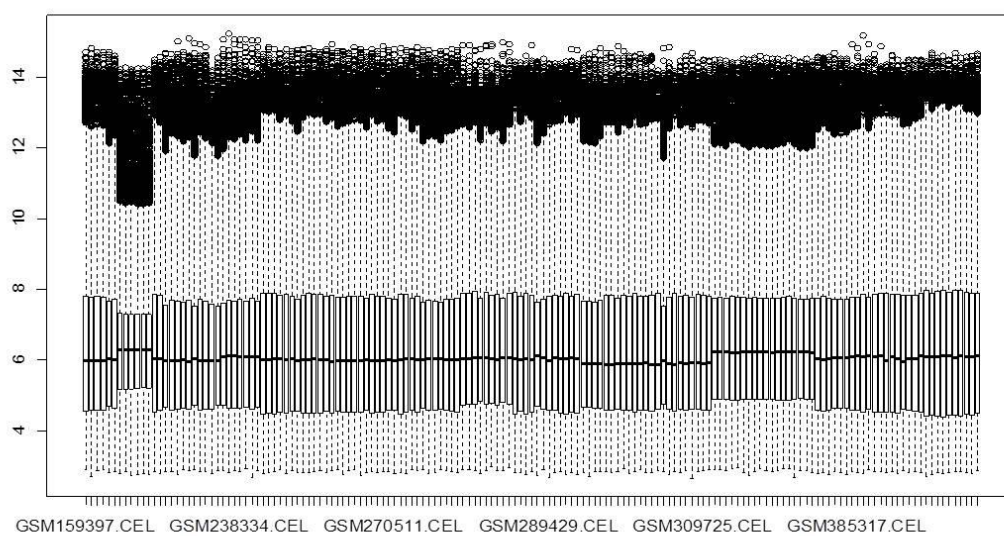

### Supplementary Data 1. Primer sequences for real-time PCR

| Gene symbol | Full name                                    |         | Primer sequence (5'-3')   | GenBank Acc. No. |
|-------------|----------------------------------------------|---------|---------------------------|------------------|
| MAEL        | maelstrom homolog                            | Forward | ACACAAGGTGCAAGTGGCATGAAG  | NM_001038193.1   |
|             |                                              | Reverse | ACATGAGCCTCTGTGAGCTGGATT  |                  |
| HINT1       | histidine triad nucleotide binding protein 1 | Forward | TGGGCCTGAAGAAAGGCTATCGAA  | NM_175812.2      |
|             |                                              | Reverse | TTCATCTGCCGACCTCCAAGAACA  |                  |
| KIAA1712    | KIAA1712                                     | Forward | TTTGAGAGGAGCAGCATTCCCAGA  | NM_001076833.1   |
|             |                                              | Reverse | CGTTTCCTACTTGGCAGGCAGATT  |                  |
| TMEM60      | transmembrane protein 60                     | Forward | AACTGGATGAGAAGGCACCTTGGA  | NM_001076988.1   |
|             |                                              | Reverse | TGTGTGATCCATGTCGAGGGTCAA  |                  |
| RHEBL1      | Ras homolog enriched in brain like 1         | Forward | AGCTGACTCAAGGCATCTTCACCA  | NM_181668.1      |
|             |                                              | Reverse | AAGAGCTCATCTCTGGGCTCACAT  |                  |
| FAM40A      | hypothetical protein LOC511120               | Forward | TGGCTTCTCTTTGATTCCCAGGGT  | NM_001075496.1   |
|             |                                              | Reverse | ACAAAGGAGCTGCAACCAACTGTG  |                  |
| S100A11     | S100 calcium binding protein A11             | Forward | ACAACAGCAAACCTCTCCAAGGCTG | BC142378.1       |

|                |                                                       |         |                          |                |
|----------------|-------------------------------------------------------|---------|--------------------------|----------------|
|                |                                                       | Reverse | ACCAGGGTCCTTCTGGTTCTTTGT |                |
| CD53           | CD53 molecule                                         | Forward | TGCCATGTGCTGGAGAGACTTCTT | NM_001034232.2 |
|                |                                                       | Reverse | TGGGAGGGAGAACAAAGACACCAA |                |
| DPYD           | dihydropyrimidine dehydrogenase                       | Forward | TGCAACATCCGCTTTACGTTGTGG | NM_174041.2    |
|                |                                                       | Reverse | GCATGGCAACAATTCTCCACCTT  |                |
| ELOVL4         | elongation of very long chain fatty acids -<br>like 4 | Forward | TGCAGTCTCCACTGCCTACACTTT | NM_001099050.1 |
|                |                                                       | Reverse | AACGCATCTGGAAAGGTTCTCGGT |                |
| CTSS           | cathepsin S                                           | Forward | ATGGGAATAAAGGCTGCAATGGCG | NM_001033615.1 |
|                |                                                       | Reverse | TGGCACTTTCCATCCATGGCTTTG |                |
| C/EBP $\alpha$ | CCAAT/enhancer binding protein, alpha                 | Forward | AGAAGTCCGTGGACAAGAACAGCA | NM_176784.2    |
|                |                                                       | Reverse | ATTGTCACTGGTCAGCTCCAGCA  |                |
| PPAR $\gamma$  | peroxisome proliferator-activated receptor<br>gamma   | Forward | AGCCTCATGAAGAGCCTTCCAAC  | NM_181024.2    |
|                |                                                       | Reverse | TCCATAGTGGAACCCTGACGCTTT |                |

---
