# Supplementary material for: Characterization of Genes for Beef Marbling Based on Applying Gene Coexpression Network
Source: Int J Genomics. 2014 Jan 30;2014:708562. doi: 10.1155/2014/708562 (PMC3929194; doi:10.1155/2014/708562)
Supplement: Supplementary file 1 — Table S1 shows “Summary of microarray data sets”. Figure S1 shows “the distribution before and after normalization”. [file 708562.f1.zip]

Archive with 3 entries (2 files):
- 708562.f1/
- 708562.f1/mat.708562.v1.docx
- 708562.f1/mat.708562.v2.pdf
